# Supplementary material for: Induction of the glycolysis product methylglyoxal on trimethylamine lyase synthesis in the intestinal microbiota from mice fed with choline and dietary fiber
Source: Royal Society of Chemistry journal article supplement (doi:10.1039/d1fo01481a), 2021-01-01
Supplement: d1fo01481a1.pdf [file d1fo01481a1.pdf]

**Table 1** The composition of animal diets

| <b>Composition</b>   | <b>C</b> | <b>M</b>     | <b>I</b>     |
|----------------------|----------|--------------|--------------|
| <b>Feed (%)</b>      |          |              |              |
| Crude protein        | 30.0     | 30.0         | 30.0         |
| Crude fat            | 4.0      | 4.0          | 4.0          |
| Soluble carbohydrate | 40.0     | 40.0         | 32.5         |
| Crude fiber          | 5.0      | 5.0          | 12.5         |
| Calcium              | 1.8      | 1.8          | 1.8          |
| Phosphorus           | 1.2      | 1.2          | 1.2          |
| Moisture             | 10.0     | 10.0         | 10.0         |
| Ash content          | 10.0     | 10.0         | 10.0         |
| <b>Water</b>         |          | 1.0% choline | 1.0% choline |

Note: C, M and I represent the control group, model group and dietary fiber intervention group, respectively. The M and I group were given with 1.0% choline supplemented in drinking water.

**Table 2** The daily intake per mouse for the diets

|                      | <b>C</b> | <b>M</b> | <b>I</b> |
|----------------------|----------|----------|----------|
| <b>Feed (g)</b>      |          |          |          |
| Crude protein        | 0.96     | 1.14     | 0.90     |
| Crude fat            | 0.13     | 0.15     | 0.12     |
| Soluble carbohydrate | 1.28     | 1.52     | 0.98     |
| Crude fiber          | 0.16     | 0.19     | 0.38     |
| Calcium              | 0.06     | 0.07     | 0.05     |
| Phosphorus           | 0.04     | 0.05     | 0.04     |
| Moisture             | 0.32     | 0.38     | 0.30     |
| Ash content          | 0.26     | 0.30     | 0.24     |
| <b>Water (mL)</b>    | 23.3     | 25.2     | 24.8     |
| Choline (mg)         | -        | 252      | 248      |

Note: C, M and I represent the control group, model group and dietary fiber intervention group, respectively. Data are presented as the mean values (n =10). The food intake was estimated by assuming from the diet composition and logs database.

**Table 3** The Operational Taxonomic Units (OUTs) relative abundances for groups at phylum level

| Phylum                      | C      | M      | I      |
|-----------------------------|--------|--------|--------|
| Bacteroidetes               | 37.88% | 21.18% | 54.86% |
| Firmicutes                  | 30.52% | 51.44% | 16.82% |
| Verrucomicrobia             | 2.12%  | 1.55%  | 4.43%  |
| Chlamydiae                  | 0.48%  | 1.90%  | 0.39%  |
| Proteobacteria              | 1.91%  | 2.21%  | 1.46%  |
| Actinobacteria              | 8.10%  | 4.90%  | 1.91%  |
| Candidatus Saccharibacteria | 0.14%  | 0.10%  | 0.09%  |
| Fibrobacteres               | 0.03%  | 0.02%  | 0.05%  |
| Spirochaetes                | 0.03%  | 0.03%  | 0.03%  |
| Tenericutes                 | 0.02%  | 0.04%  | 0.01%  |
| Others                      | 18.78% | 16.65% | 19.97% |

**Table 4** The top 35 genera were annotated according to the species and abundance information of samples identified in mice fed the defined diets

| genus                       | C      | M      | I      | Tax_detail                                                                            |
|-----------------------------|--------|--------|--------|---------------------------------------------------------------------------------------|
| <i>Lactobacillus</i>        | 10.50% | 11.73% | 1.38%  | p__Firmicutes;c__Bacilli;o__Lactobacillales;f__Lactobacillaceae;                      |
| <i>Bacteroides</i>          | 10.44% | 6.71%  | 14.78% | p__Bacteroidetes;c__Bacteroidia;o__Bacteroidales;f__Bacteroidaceae;                   |
| <i>Prevotella</i>           | 7.96%  | 3.63%  | 10.63% | p__Bacteroidetes;c__Bacteroidia;o__Bacteroidales;f__Prevotellaceae;                   |
| <i>Clostridium</i>          | 1.85%  | 2.26%  | 0.95%  | p__Firmicutes;c__Clostridia;o__Clostridiales;f__Clostridiaceae                        |
| <i>Dubosiella</i>           | 0.47%  | 2.20%  | 0.42%  | p__Firmicutes;c__Erysipelotrichia;o__Erysipelotrichales;f__Erysipelotrichaceae;       |
| <i>Bifidobacterium</i>      | 1.96%  | 0.85%  | 4.49%  | p__Actinobacteria;c__unidentified_Actinobacteria;o__Bifidobacteriales;                |
| <i>Paenarthrobacter</i>     | 0.47%  | 1.89%  | 0.39%  | p__Chlamydiae;c__Chlamydiia;o__Chlamydiales;f__Chlamydiaceae;                         |
| <i>Akkermansia</i>          | 2.10%  | 1.53%  | 4.39%  | p__Verrucomicrobia;c__Verrucomicrobiae;o__Verrucomicrobiales;                         |
| <i>Enterorhabdus</i>        | 0.58%  | 1.50%  | 0.28%  | p__Actinobacteria;c__Coriobacteriia;o__Coriobacteriales;f__Eggerthellaceae;           |
| <i>Eubacterium</i>          | 0.60%  | 0.27%  | 1.15%  | p__Firmicutes;c__Clostridia;o__Clostridiales;f__Eubacteriaceae;                       |
| <i>Desulfovibrio</i>        | 0.38%  | 0.84%  | 0.38%  | p__Proteobacteria;c__Deltaproteobacteria;o__Desulfovibrionales;                       |
| <i>Alistipes</i>            | 1.11%  | 0.80%  | 1.99%  | p__Bacteroidetes;c__Bacteroidia;o__Bacteroidales;f__Rikenellaceae;                    |
| <i>Ruminococcus</i>         | 0.67%  | 0.24%  | 0.67%  | p__Firmicutes;c__Clostridia;o__Clostridiales;f__Lachnospiraceae;                      |
| <i>Pseudoflavonifractor</i> | 0.50%  | 0.76%  | 0.61%  | p__Firmicutes;c__Clostridia;o__Clostridiales;f__Unclassified;                         |
| <i>Roseburia</i>            | 0.45%  | 0.14%  | 0.59%  | p__Firmicutes;c__Clostridia;o__Clostridiales;f__Lachnospiraceae;                      |
| <i>Parabacteroides</i>      | 1.08%  | 0.59%  | 1.59%  | p__Bacteroidetes;c__Bacteroidia;o__Bacteroidales;f__Tannerellaceae;                   |
| <i>Faecalibaculum</i>       | 0.12%  | 0.52%  | 0.06%  | p__Firmicutes;c__Erysipelotrichia;o__Erysipelotrichales;f__Erysipelotrichaceae;       |
| <i>Lachnoclostridium</i>    | 0.29%  | 0.36%  | 0.24%  | p__Firmicutes;c__Clostridia;o__Clostridiales;f__Lachnospiraceae;                      |
| <i>Oscillibacter</i>        | 0.26%  | 0.32%  | 0.39%  | p__Firmicutes;c__Clostridia;o__Clostridiales;                                         |
| <i>Flavonifractor</i>       | 0.26%  | 0.31%  | 0.30%  | p__Firmicutes;c__Clostridia;o__Clostridiales;f__Unclassified;                         |
| <i>Dorea</i>                | 0.18%  | 0.31%  | 0.19%  | p__Firmicutes;c__Clostridia;o__Clostridiales;f__Lachnospiraceae;                      |
| <i>Turcibacter</i>          | 0.29%  | 0.51%  | 0.01%  | p__Firmicutes;c__Erysipelotrichia;o__Erysipelotrichales;f__Erysipelotrichaceae;       |
| <i>Anaerotruncus</i>        | 0.11%  | 0.25%  | 0.13%  | p__Firmicutes;c__Clostridia;o__Clostridiales;f__Ruminococcaceae;                      |
| <i>Adlercreutzia</i>        | 0.30%  | 0.18%  | 0.13%  | p__Actinobacteria;c__Coriobacteriia;o__Coriobacteriales;                              |
| <i>Blautia</i>              | 0.11%  | 0.17%  | 0.09%  | p__Firmicutes;c__Clostridia;o__Clostridiales;f__Lachnospiraceae;                      |
| <i>Barnesiella</i>          | 0.27%  | 0.15%  | 0.40%  | p__Bacteroidetes;c__Bacteroidia;o__Bacteroidales;f__Barnesiellaceae;                  |
| <i>Butyrivibrio</i>         | 0.18%  | 0.12%  | 0.86%  | p__Firmicutes;c__Clostridia;o__Clostridiales;f__Lachnospiraceae;                      |
| <i>Faecalibacterium</i>     | 0.07%  | 0.17%  | 0.12%  | p__Firmicutes;c__Clostridia;o__Clostridiales;f__Ruminococcaceae;                      |
| <i>Butyricimonas</i>        | 0.18%  | 0.11%  | 0.37%  | p__Bacteroidetes;c__Bacteroidia;o__Bacteroidales;f__Odoribacteraceae;                 |
| <i>Rikenella</i>            | 0.19%  | 0.09%  | 0.86%  | p__Bacteroidetes;c__Bacteroidia;o__Bacteroidales;f__Rikenellaceae;                    |
| <i>Odoribacter</i>          | 0.19%  | 0.04%  | 0.92%  | p__Bacteroidetes;c__Bacteroidia;o__Bacteroidales;                                     |
| <i>Olsenella</i>            | 0.12%  | 0.04%  | 0.62%  | p__Actinobacteria;c__Coriobacteriia;o__Coriobacteriales;f__Atopobiaceae;              |
| <i>Millionella</i>          | 0.06%  | 0.03%  | 0.26%  | p__Bacteroidetes;c__Bacteroidia;o__Bacteroidales;f__Rikenellaceae;                    |
| <i>Libanicoccus</i>         | 0.19%  | 0.01%  | 0.03%  | p__Actinobacteria;c__Coriobacteriia;o__Coriobacteriales;f__Atopobiaceae;              |
| <i>Helicobacter</i>         | 0.51%  | 1.10%  | 0.00%  | p__Proteobacteria;c__Epsilonproteobacteria;o__Campylobacterales;f__Helicobacteraceae; |

**Table 5** The Spearman correlation analysis between species and the key physicochemical parameters of choline metabolism

|                             | <i>r</i> (TMA) | <i>p</i> value | <i>r</i> (TMAO) | <i>p</i> value |
|-----------------------------|----------------|----------------|-----------------|----------------|
| <i>Lactobacillus</i>        | 0.504          | 0.257          | 0.524           | 0.246          |
| <i>Bacteroides</i>          | -0.692         | 0.039          | -0.684          | 0.042          |
| <i>Prevotella</i>           | -0.539         | 0.134          | -0.529          | 0.143          |
| <i>Clostridium</i>          | 0.383          | 0.332          | 0.4             | 0.321          |
| <i>Dubosiella</i>           | 0.892          | 0.001          | 0.887           | 0.003          |
| <i>Bifidobacterium</i>      | -0.623         | 0.028          | -0.606          | 0.017          |
| <i>Paenarthrobacter</i>     | 0.884          | 0.102          | 0.88            | 0.112          |
| <i>Akkermansia</i>          | -0.913         | 0.005          | -0.938          | 0.003          |
| <i>Enterorhabdus</i>        | 0.686          | 0.142          | 0.678           | 0.145          |
| <i>Eubacterium</i>          | -0.64          | 0.063          | 0.632           | 0.060          |
| <i>Desulfovibrio</i>        | 0.814          | 0.008          | 0.809           | 0.012          |
| <i>Alistipes</i>            | -0.453         | 0.288          | -0.471          | 0.277          |
| <i>Ruminococcus</i>         | -0.856         | 0.053          | -0.852          | 0.054          |
| <i>Pseudoflavonifractor</i> | 0.676          | 0.046          | 0.679           | 0.044          |
| <i>Roseburia</i>            | -0.395         | 0.293          | -0.386          | 0.304          |
| <i>Parabacteroides</i>      | -0.418         | 0.263          | -0.408          | 0.276          |
| <i>Faecalibaculum</i>       | 0.816          | 0.107          | 0.812           | 0.108          |
| <i>Lachnoclostridium</i>    | 0.606          | 0.200          | 0.61            | 0.198          |
| <i>Oscillibacter</i>        | -0.599         | 0.202          | -0.599          | 0.201          |
| <i>Flavonifractor</i>       | 0.797          | 0.203          | 0.779           | 0.113          |
| <i>Dorea</i>                | 0.506          | 0.256          | 0.508           | 0.225          |
| <i>Turicibacter</i>         | 0.671          | 0.814          | 0.665           | 0.504          |
| <i>Anaerotruncus</i>        | 0.453          | 0.221          | 0.45            | 0.224          |
| <i>Adlercreutzia</i>        | -0.614         | 0.195          | -0.607          | 0.211          |
| <i>Blautia</i>              | 0.401          | 0.285          | 0.399           | 0.288          |
| <i>Barnesiella</i>          | -0.441         | 0.235          | -0.445          | 0.292          |
| <i>Butyrivibrio</i>         | -0.615         | 0.195          | -0.636          | 0.184          |
| <i>Faecalibacterium</i>     | 0.379          | 0.153          | 0.378           | 0.136          |
| <i>Butyricimonas</i>        | -0.504         | 0.257          | -0.513          | 0.252          |
| <i>Rikenella</i>            | -0.445         | 0.145          | -0.552          | 0.131          |
| <i>Odoribacter</i>          | -0.511         | 0.253          | -0.53           | 0.242          |
| <i>Olsenella</i>            | -0.61          | 0.198          | -0.63           | 0.187          |
| <i>Millionella</i>          | -0.373         | 0.338          | -0.384          | 0.331          |
| <i>Libanicoccus</i>         | -0.639         | 0.064          | -0.643          | 0.062          |
| <i>Helicobacter</i>         | 0.465          | 0.205          | 0.455           | 0.219          |

Note: Data are mean. *r* represents the correlation coefficient of environmental factors and species distribution, where the larger the value, the greater biological relevance between environmental factors and species distribution. *p* value < 0.05 means the correlation is significant at the 0.05 level (2-tailed). *p* value < 0.01 means the correlation is highly significant at the 0.01 level (2-tailed).

**Table 6** Relative abundance (%) of gene clusters responsible for choline metabolism and TMA lyase activity

| Group | 1.97.1.- (CutD)   | 4.3.99.4 (CutC)   | TMA lyase |
|-------|-------------------|-------------------|-----------|
| C     | 0.000013±0.000001 | 0.000013±0.000001 | 0.06±0.03 |
| CG    | 0.000016±0.000000 | 0.000016±0.000000 | 0.10±0.03 |
| CGM   | 0.000020±0.000001 | 0.000020±0.000001 | 0.16±0.02 |
| M     | 0.000050±0.000001 | 0.000060±0.000002 | 0.48±0.06 |
| MG    | 0.000060±0.000001 | 0.000070±0.000001 | 0.66±0.06 |
| MGM   | 0.000067±0.000001 | 0.000078±0.000001 | 0.99±0.07 |
| I     | 0.000030±0.000001 | 0.000040±0.000001 | 0.24±0.04 |
| IG    | 0.000033±0.000001 | 0.000033±0.000001 | 0.33±0.04 |
| IGM   | 0.000036±0.000001 | 0.000036±0.000001 | 0.44±0.05 |

Note: C(M, I), C (M, IG), and C(M, I)GM, represent anaerobic culture of intestinal digesta samples removed from the mice fed on the C(M, I) group diet using a medium supplied with 1.0% choline, a mixture of 1.0% glycine and 1.0% choline, another of 1.0% glycine, 1.5 mmol L<sup>-1</sup> methylglyoxal and 1.0% choline.

**Table 7** The relative abundance of enzymes associated with biosynthesis and utilization of glycine

| KEGG_Description                                            | EC                | ID           | C        | CG       | CGM      | M        | MG       | MGM      | I        | IG       | IGM      |
|-------------------------------------------------------------|-------------------|--------------|----------|----------|----------|----------|----------|----------|----------|----------|----------|
| <b>Glycine, serine and threonine metabolism</b>             |                   |              |          |          |          |          |          |          |          |          |          |
| choline dehydrogenase                                       | 1.1.1.1           | <i>gbsB</i>  | 0.000063 | 0.000056 | 0.000052 | 0.000118 | 0.000110 | 0.000101 | 0.000024 | 0.000020 | 0.000018 |
| betaine-homocysteine S-methyltransferase                    | 2.1.1.5           | <i>BHMT</i>  | 0        | 0        | 0        | 0.000003 | 0.000002 | 0.000001 | 0        | 0        | 0        |
| sarcosine oxidase / L-pipecolate oxidase                    | 1.5.3.1           | <i>PIPOX</i> | 0.000002 | 0.000002 | 0.000001 | 0.000008 | 0.000006 | 0.000005 | 0.000005 | 0.000003 | 0.000002 |
| glycine N-methyltransferase                                 | 2.1.1.20          | <i>GNMT</i>  | 0        | 0        | 0        | 0.000001 | 0.000001 | 0        | 0        | 0        | 0        |
| threonine aldolase                                          | 4.1.2.48          | <i>ItaE</i>  | 0.000152 | 0.000160 | 0.000147 | 0.000113 | 0.000136 | 0.000102 | 0.000224 | 0.000236 | 0.000215 |
| threonine 3-dehydrogenase                                   | 1.1.1.103         | <i>TDH</i>   | 0.000014 | 0.000018 | 0.000001 | 0.000019 | 0.000028 | 0.000009 | 0.000020 | 0.000023 | 0.000015 |
| glycine C-acetyltransferase                                 | 2.3.1.29          | <i>kbl</i>   | 0.000087 | 0.000093 | 0.000081 | 0.000055 | 0.000068 | 0.000041 | 0.000150 | 0.000158 | 0.000142 |
| monoamine oxidase                                           | 1.4.3.4           | <i>aofH</i>  | 0.000001 | 0.000003 | 0        | 0        | 0        | 0        | 0.000001 | 0.000003 | 0.000001 |
| glycine hydroxymethyltransferase                            | 2.1.2.1           | <i>glyA</i>  | 0.000300 | 0.000291 | 0.000288 | 0.000361 | 0.000353 | 0.000348 | 0.000259 | 0.000250 | 0.000243 |
| L-serine/L-threonine ammonia-lyase                          | 4.3.1.19          | <i>SDS</i>   | 0.000248 | 0.000240 | 0.000256 | 0.000228 | 0.000223 | 0.000233 | 0.000193 | 0.000187 | 0.000196 |
| L-serine dehydratase                                        | 4.3.1.17          | <i>sdaA</i>  | 0.000255 | 0.000241 | 0.000263 | 0.000321 | 0.000310 | 0.000328 | 0.000232 | 0.000219 | 0.000241 |
| <b>Glycolysis/Gluconeogenesis</b>                           |                   |              |          |          |          |          |          |          |          |          |          |
| sugar PTS system EIIA component                             | 2.7.1.-           | <i>crr</i>   | 0.000457 | 0.000454 | 0.000452 | 0.000996 | 0.000991 | 0.000989 | 0.000219 | 0.000217 | 0.000215 |
| glucose PTS system EIIB component                           | 2.7.1.199         | <i>ptsGb</i> | 0.000026 | 0.000025 | 0.000024 | 0.000027 | 0.000026 | 0.000025 | 0.000009 | 0.000009 | 0.000008 |
| phosphoglucomutase/phosphopentomutase                       | 5.4.2.7           | <i>PGM2</i>  | 0.000087 | 0.000086 | 0.000085 | 0.000187 | 0.000186 | 0.000185 | 0.000056 | 0.000056 | 0.000055 |
| glucose-6-phosphate isomerase                               | 5.3.1.9           | <i>pgi</i>   | 0.000398 | 0.000395 | 0.000393 | 0.000446 | 0.000441 | 0.000438 | 0.000314 | 0.000312 | 0.000310 |
| 6-phosphofructokinase 1                                     | 2.7.1.11          | <i>pfkA</i>  | 0.000197 | 0.000193 | 0.000192 | 0.000206 | 0.000202 | 0.000198 | 0.000185 | 0.000182 | 0.000180 |
| fructose-bisphosphate aldolase, class II                    | 4.1.2.13          | <i>fbaA</i>  | 0.000386 | 0.000373 | 0.000368 | 0.000369 | 0.000359 | 0.000349 | 0.000301 | 0.000289 | 0.000282 |
| triosephosphate isomerase (TIM)                             | 5.3.1.1           | <i>tpiA</i>  | 0.000338 | 0.000328 | 0.000322 | 0.000374 | 0.000365 | 0.000352 | 0.000273 | 0.000263 | 0.000259 |
| methylglyoxal synthase                                      | 4.2.3.3           | <i>mgsA</i>  | 0.000174 | 0.000161 | 0.000158 | 0.000196 | 0.000181 | 0.000176 | 0.000114 | 0.000107 | 0.000101 |
| glyceraldehyde-3-phosphate dehydrogenase (NAD(P))           | 1.2.1.59          | <i>gap2</i>  | 0.000002 | 0.000002 | 0.000003 | 0        | 0        | 0        | 0.000001 | 0.000001 | 0.000001 |
| glyceraldehyde-3-phosphate dehydrogenase (NADP+)            | 1.2.1.9           | <i>gapN</i>  | 0.000001 | 0.000001 | 0.000002 | 0.000002 | 0.000003 | 0.000004 | 0.000004 | 0.000004 | 0.000005 |
| phosphoglycerate kinase                                     | 2.7.2.3           | <i>pgk</i>   | 0.000341 | 0.000354 | 0.000363 | 0.000292 | 0.000299 | 0.000306 | 0.000328 | 0.000338 | 0.000346 |
| 2,3-bisphosphoglycerate-independent phosphoglycerate mutase | 5.4.2.12          | <i>gpmI</i>  | 0.000359 | 0.000373 | 0.000381 | 0.000330 | 0.000338 | 0.000343 | 0.000414 | 0.000423 | 0.000430 |
| enolase                                                     | 4.2.1.11          | <i>eno</i>   | 0.000360 | 0.000375 | 0.000381 | 0.000346 | 0.000356 | 0.000365 | 0.000302 | 0.000309 | 0.000317 |
| pyruvate kinase                                             | 2.7.1.40          | <i>pyk</i>   | 0.000254 | 0.000268 | 0.000276 | 0.000465 | 0.000477 | 0.000488 | 0.000205 | 0.000218 | 0.000225 |
| lactaldehyde dehydrogenase/glycolaldehyde dehydrogenase     | 1.2.1.22,1.2.1.21 | <i>aldA</i>  | 0.000321 | 0.000346 | 0.000353 | 0.000232 | 0.000245 | 0.000252 | 0.000310 | 0.000333 | 0.000340 |
| L-lactate dehydrogenase                                     | 1.1.1.27          | <i>ldh</i>   | 0.000345 | 0.000361 | 0.000371 | 0.000535 | 0.000516 | 0.000544 | 0.000067 | 0.000075 | 0.000080 |

Note: EC is the description of KEGG enzyme number. C(M, I), C (M, I)G, and C(M, I)GM, represent anaerobic culture of intestinal digesta samples removed from the mice fed on the C(M, I) group diet using a medium supplied with 1.0% choline, a mixture of 1.0% glycine and 1.0% choline, another of 1.0% glycine, 1.5 mmol L<sup>-1</sup> methylglyoxal and 1.0% choline.

**Table 8** The pearson correlation analysis among key enzymes expression of choline metabolism and enzymes associated with biosynthesis and utilization of glycine

|               | CutD    | CutC   | Methylglyoxal | Pyruvate | Glycine |
|---------------|---------|--------|---------------|----------|---------|
| CutD          |         | .992** | .779*         | .730     | .754*   |
|               | 1       | .000   | .013          | .055     | .019    |
| CutC          | .992**  | 1      | .782*         | .701     | .688*   |
|               | .000    |        | .016          | .052     | .040    |
| Methylglyoxal | .779*   | .782*  | 1             | .772*    | -.799*  |
|               | .013    | .016   |               | .015     | .049    |
| Pyruvate      | .730    | .701   | .772*         | 1        | .657    |
|               | .055    | .052   | .015          |          | .173    |
| Glycine       | .754*   | .688*  | -.799*        | .657     | 1       |
|               | .019    | .040   | .049          | .173     |         |
| gbsB          | .631    | .539   | .508          | -.769    | .907**  |
|               | .068    | .134   | .255          | .115     | .001    |
| BHMT          | .768*   | .721*  | -.692         | -.329    | .751*   |
|               | .016    | .028   | .154          | .388     | .020    |
| PIPOX         | .823**  | .817** | -.484         | -.615    | .566    |
|               | .006    | .007   | .187          | .078     | .112    |
| GNMT          | .552    | .532   | -.795         | -.596    | .616    |
|               | .123    | .140   | .101          | .206     | .077    |
| ItaE          | -.411   | -.296  | -.536         | -.640    | -.814** |
|               | .272    | .439   | .137          | .181     | .008    |
| TDH           | .448    | .348   | -.702*        | -.561    | .692    |
|               | .291    | .358   | .035          | .116     | .154    |
| kbl           | -.943** | -.958* | -.942**       | -.636    | -.831** |
|               | .000    | .021   | .000          | .184     | .005    |
| aofH          | -.725*  | -.731* | -.933*        | .874     | -.480   |
|               | .047    | .020   | .033          | .062     | .191    |
| glyA          | .630    | .538   | .512          | -.738    | .906**  |
|               | .069    | .135   | .253          | .130     | .001    |
| SDS           | -.485   | -.382  | -.421         | -.441    | .408    |
|               | .269    | .311   | .259          | .295     | .276    |
| sdaA          | .729*   | .686*  | .943**        | .882*    | .957**  |
|               | .026    | .042   | .000          | .015     | .000    |
| crr           | .713*   | .645   | .985**        | .677     | .960**  |
|               | .031    | .061   | .000          | -.162    | .000    |
| ptsGb         | .744    | .986   | .713*         | .525     | .698*   |
|               | .127    | .007   | .031          | .245     | .036    |
| PGM2          | .449    | .513   | .973**        | -.575    | .960**  |
|               | .225    | .158   | .000          | .217     | .000    |
| pgi           | .424    | .412   | .958**        | .851     | .866**  |
|               | .255    | .313   | .000          | .074     | .003    |
| pfkA          | .407    | .416   | .948**        | -.751    | .799**  |



|      |         |         |         |         |         |
|------|---------|---------|---------|---------|---------|
|      | .277    | .311    | .000    | .124    | .010    |
| fbaA | -.755   | -.539   | .788*   | .458    | .491    |
|      | .122    | .237    | .012    | .284    | .180    |
| tpiA | .386    | .466    | .950**  | -.993   | .828**  |
|      | .304    | .280    | .000    | .368    | .006    |
| mgsA | .447    | .639    | .922**  | .911    | .766*   |
|      | .292    | .182    | .000    | .435    | .016    |
| gapN | .489    | .575    | -.758*  | -.442   | -.751   |
|      | .182    | .106    | .018    | .294    | .124    |
| gap2 | -.901** | -.926** | .635    | .675*   | -.601   |
|      | .001    | .000    | .066    | .046    | .087    |
| pgk  | -.870** | -.859** | -.743*  | .684*   | -.734*  |
|      | .002    | .003    | .022    | .042    | .024    |
| gpmI | -.430   | -.328   | -.963** | .868    | -.842** |
|      | .248    | .389    | .000    | .065    | .004    |
| eno  | -.799   | .560    | .921**  | .625    | .514    |
|      | .099    | -.225   | .000    | .072    | .157    |
| pyk  | .817**  | .741*   | .954**  | .970**  | -.635   |
|      | .007    | .022    | .000    | .000    | .184    |
| aldA | -.860** | -.828** | -.845** | -.811** | .573    |
|      | .003    | .006    | .004    | .008    | .107    |
| ldh  | .458    | .345    | .960**  | .884**  | .776    |
|      | .215    | .363    | .000    | .002    | .111    |

---

\*\* . Correlation is significant at the 0.01 level (2-tailed). \* . Correlation is significant at the 0.05 level (2-tailed).
